# Supplementary material for: A wearable, minimally-invasive, fully electrochemically-controlled feedback minisystem for diabetes management
Source: Royal Society of Chemistry journal article supplement (doi:10.1039/d2lc00797e), 2022-12-06
Supplement: d2lc00797e1.pdf [file d2lc00797e1.pdf]

## Electronic Supplementary Information

# A Wearable, Minimally-Invasive, Fully Electrochemically-Controlled Feedback Minisystem for Diabetes Management

Yiqun Liu,<sup>a</sup> Qi Yu,<sup>b</sup> Le Ye,<sup>c</sup> Li Yang,<sup>\*b</sup> Yue Cui<sup>\*a</sup>

<sup>a</sup>School of Materials Science and Engineering, Peking University; First Hospital Interdisciplinary Research Center, Peking University, Beijing 100871, P.R. China. Email: [ycui@pku.edu.cn](mailto:ycui@pku.edu.cn)

<sup>b</sup>Renal Division, Peking University First Hospital; Peking University Institute of Nephrology; Key Laboratory of Renal Dis-ease, Ministry of Health of China; Key Laboratory of Chronic Kidney Disease Prevention and Treatment (Peking University), Ministry of Education, Beijing, 100034, P.R. China. Email: [li.yang@bjmu.edu.cn](mailto:li.yang@bjmu.edu.cn)

<sup>c</sup>Institute of Microelectronics, Peking University, Beijing 100871, P.R. China.

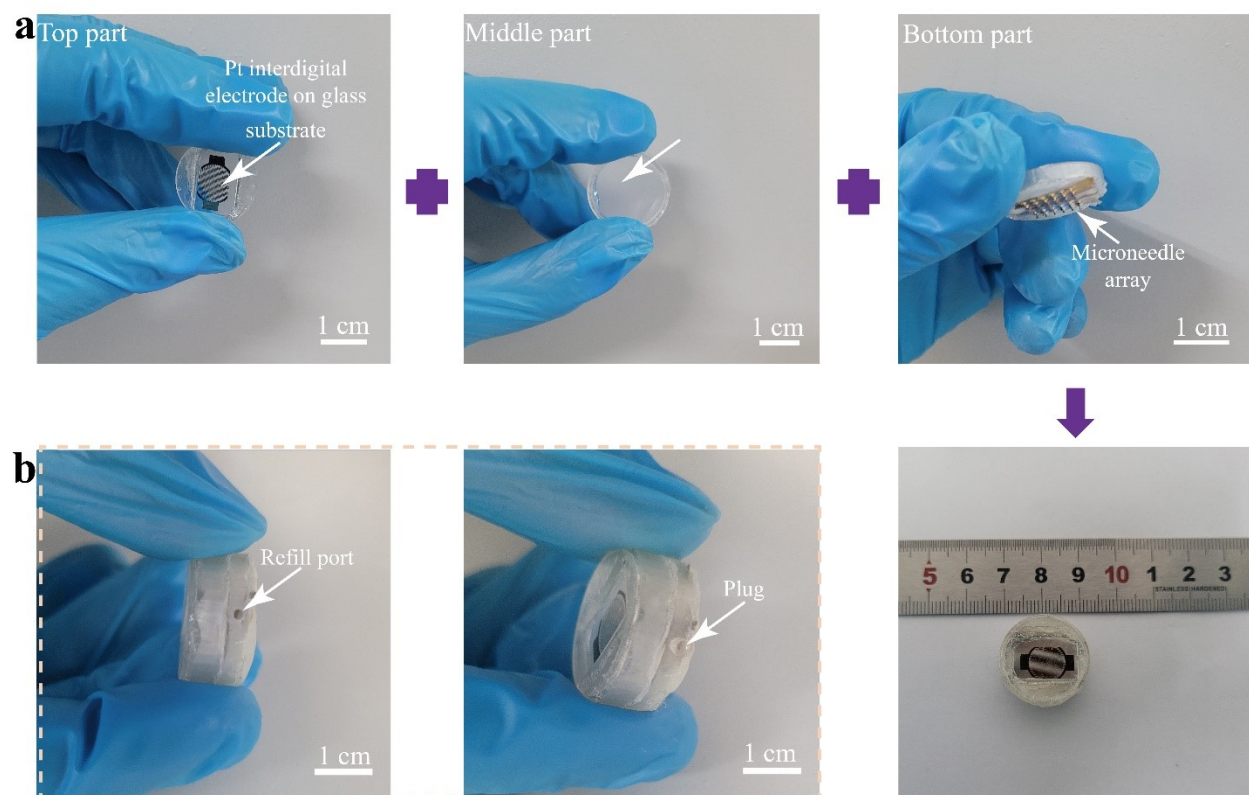

**Fig. S1** Components of the system. (a) Camera images of different components of the system. (b) Camera images of the refill port and plug in the system.

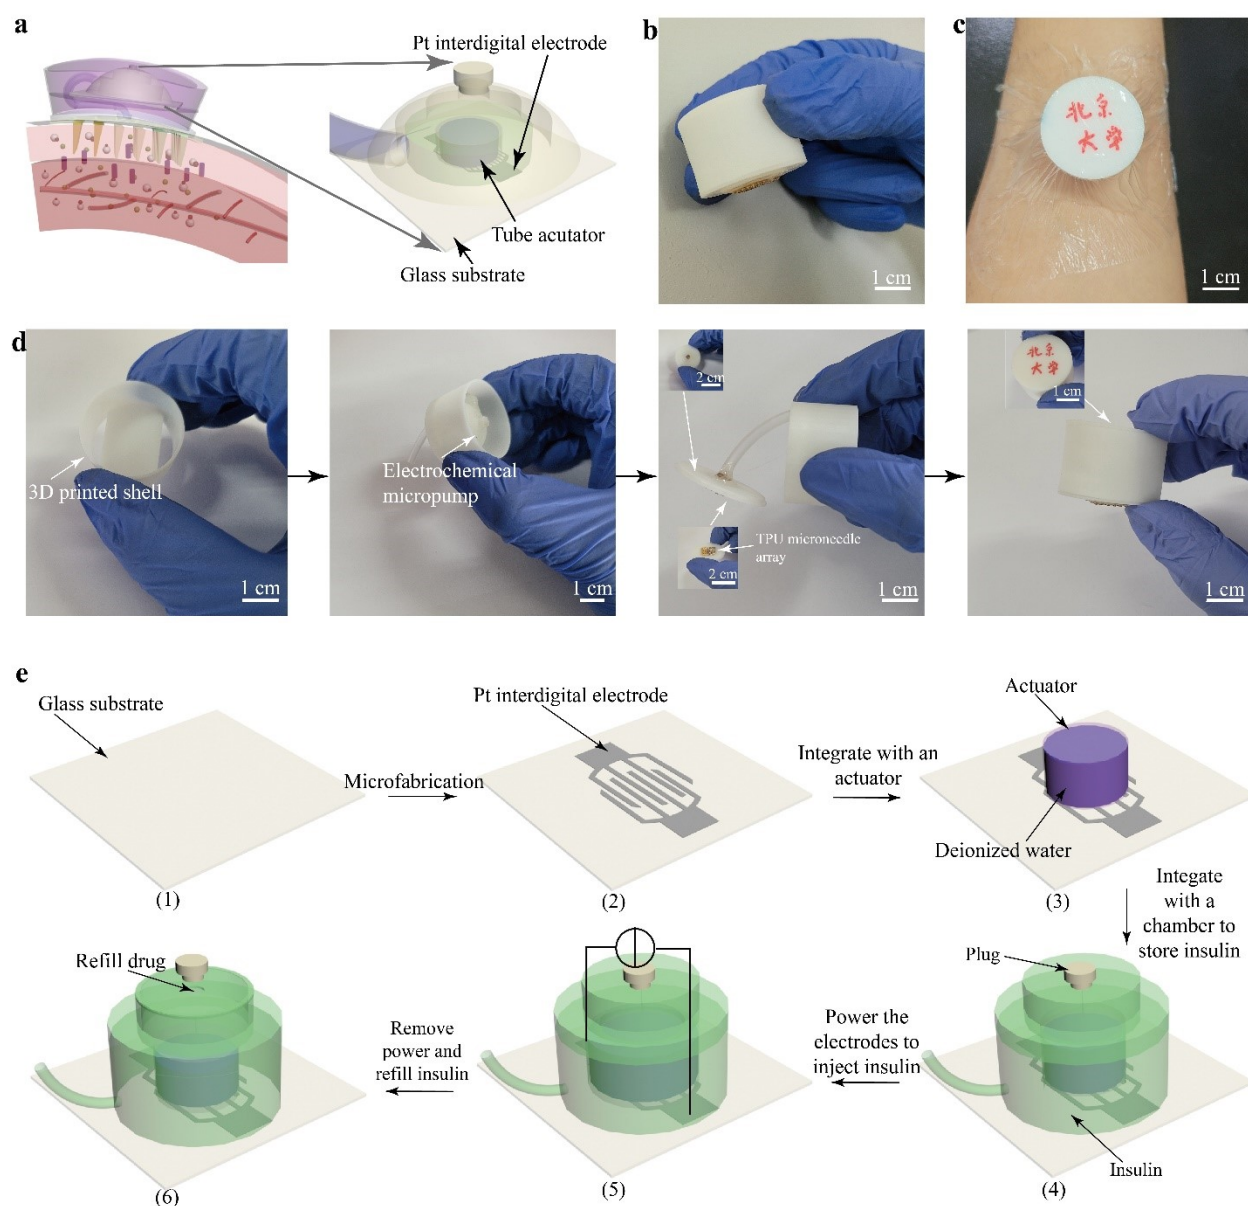

**Fig. S2** Another form of the electrochemical micropump to form the closed-loop system with a larger size for storing more insulin solution. (a) Illustrative scheme of another form of the electrochemical micropump to form the closed-loop system. (b) Photograph of the whole system. (c) Photograph of the system applied to the arm of the human body. (d) The assemble and package process of the biosensor and micropump. (e) Fabrication process of the micropump.

The working principle of this micropump (in Fig. S2) was same as that shown in Fig. 1a. The actuator was in a cylinder made of commercially available Teflon membrane (30  $\mu\text{m}$  thick) that was adhered and sealed to the Pt interdigital electrodes with a waterproof adhesive. The cylinder had a diameter of about 7 mm and a height of about 7 mm, and was filled with deionized water as the electrolyte. The actuator and electrodes were then encapsulated in a 3D printed hollow chamber with a bottom diameter of 2.3 cm and a height of 1 cm. The micropump was integrated with the TPU microneedles and a flexible catheter for controlling the release of insulin into the dermis through the internal channels of the hollow microneedle. Finally, the micropump and the microneedle arrays were packaged in a 3D printed cylinder (3 cm in diameter and 2 cm in height).

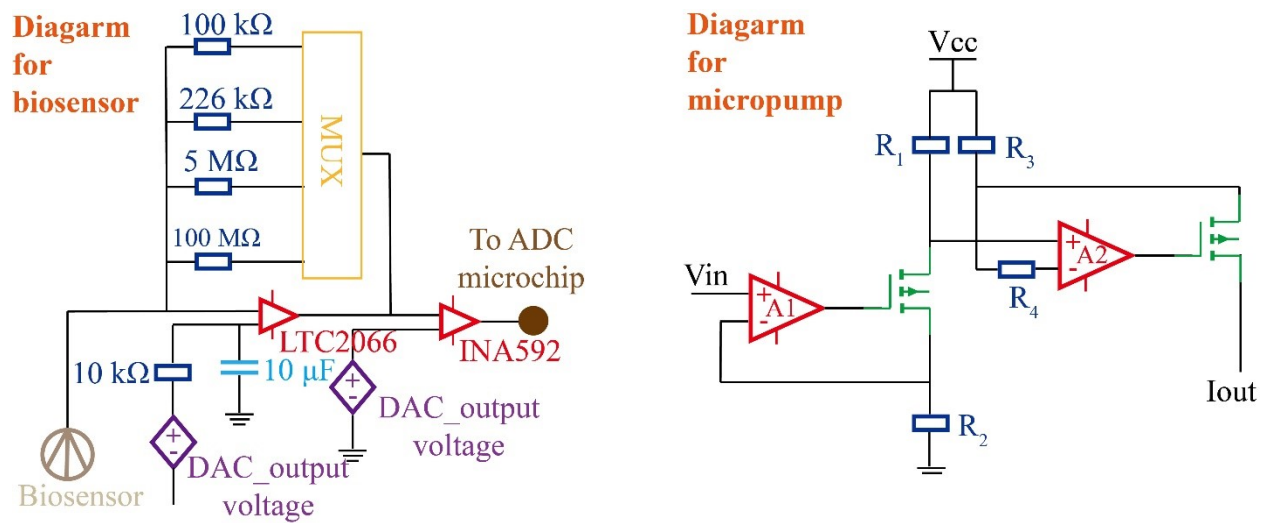

**Fig. S3** Schematic diagram of PCB for the biosensor and micropump.

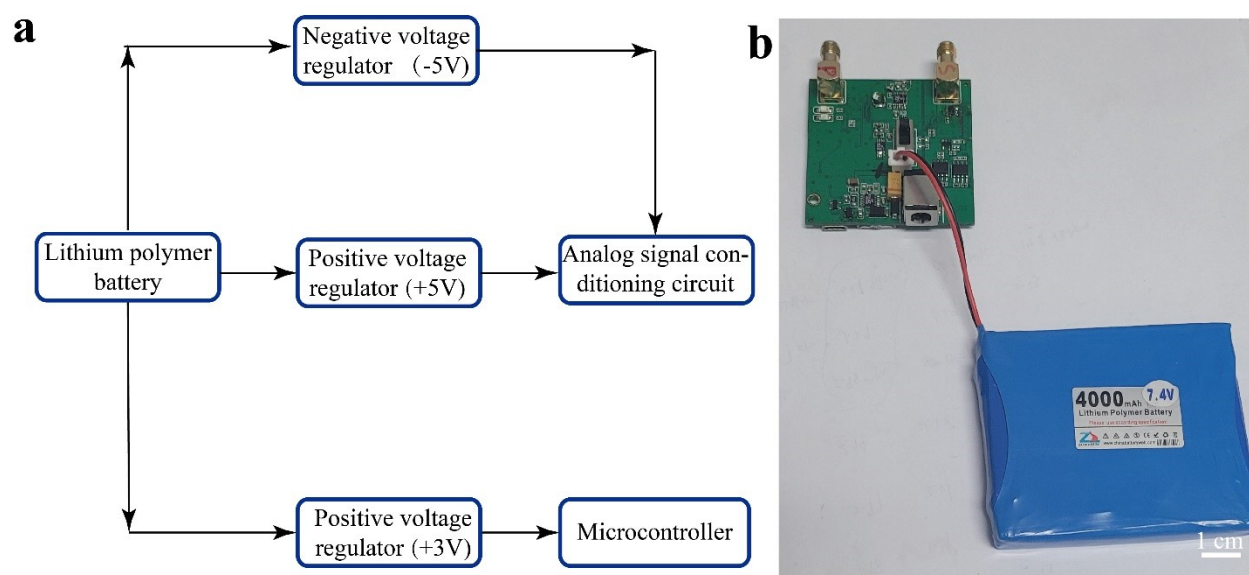

**Fig. S4** Power delivery and battery for the system. (a) Power delivery diagram of the system. (b) The representative photograph of the battery module used in the current work.

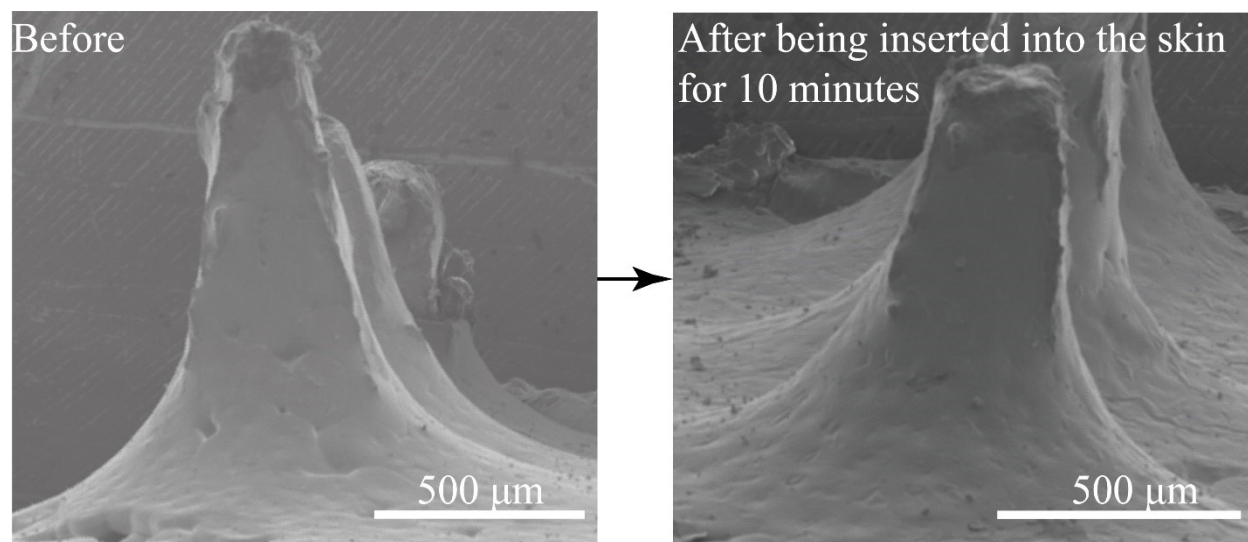

**Fig. S5** SEM images of the microneedle before and after being inserted into the skin for 10 min.

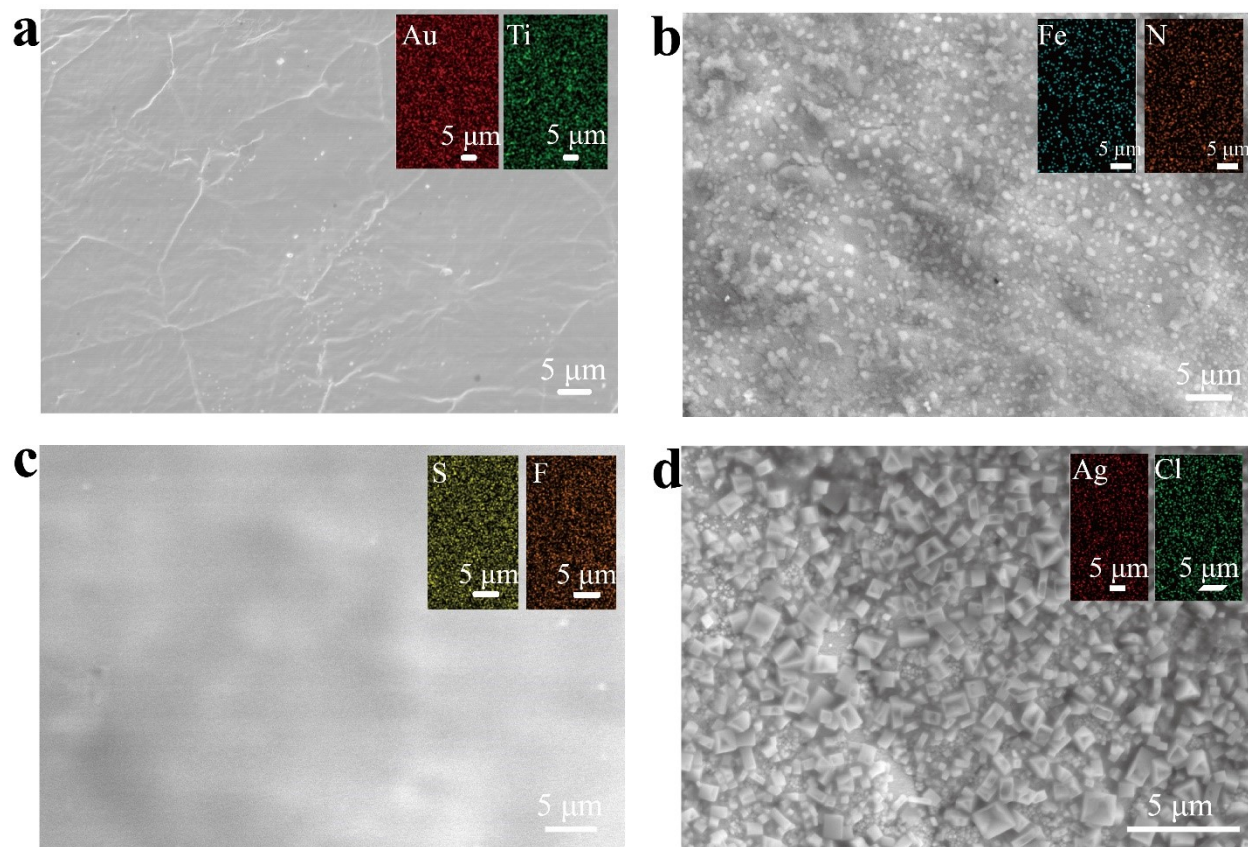

**Fig. S6** SEM images and EDS mapping analysis of the Au electrode and the Ag/AgCl electrode. (a) The original Au electrode. (b) The Au electrode after the deposition of Prussian blue. (c) The Au electrode modified with the Nafion membrane. (d) The Ag/AgCl electrode.

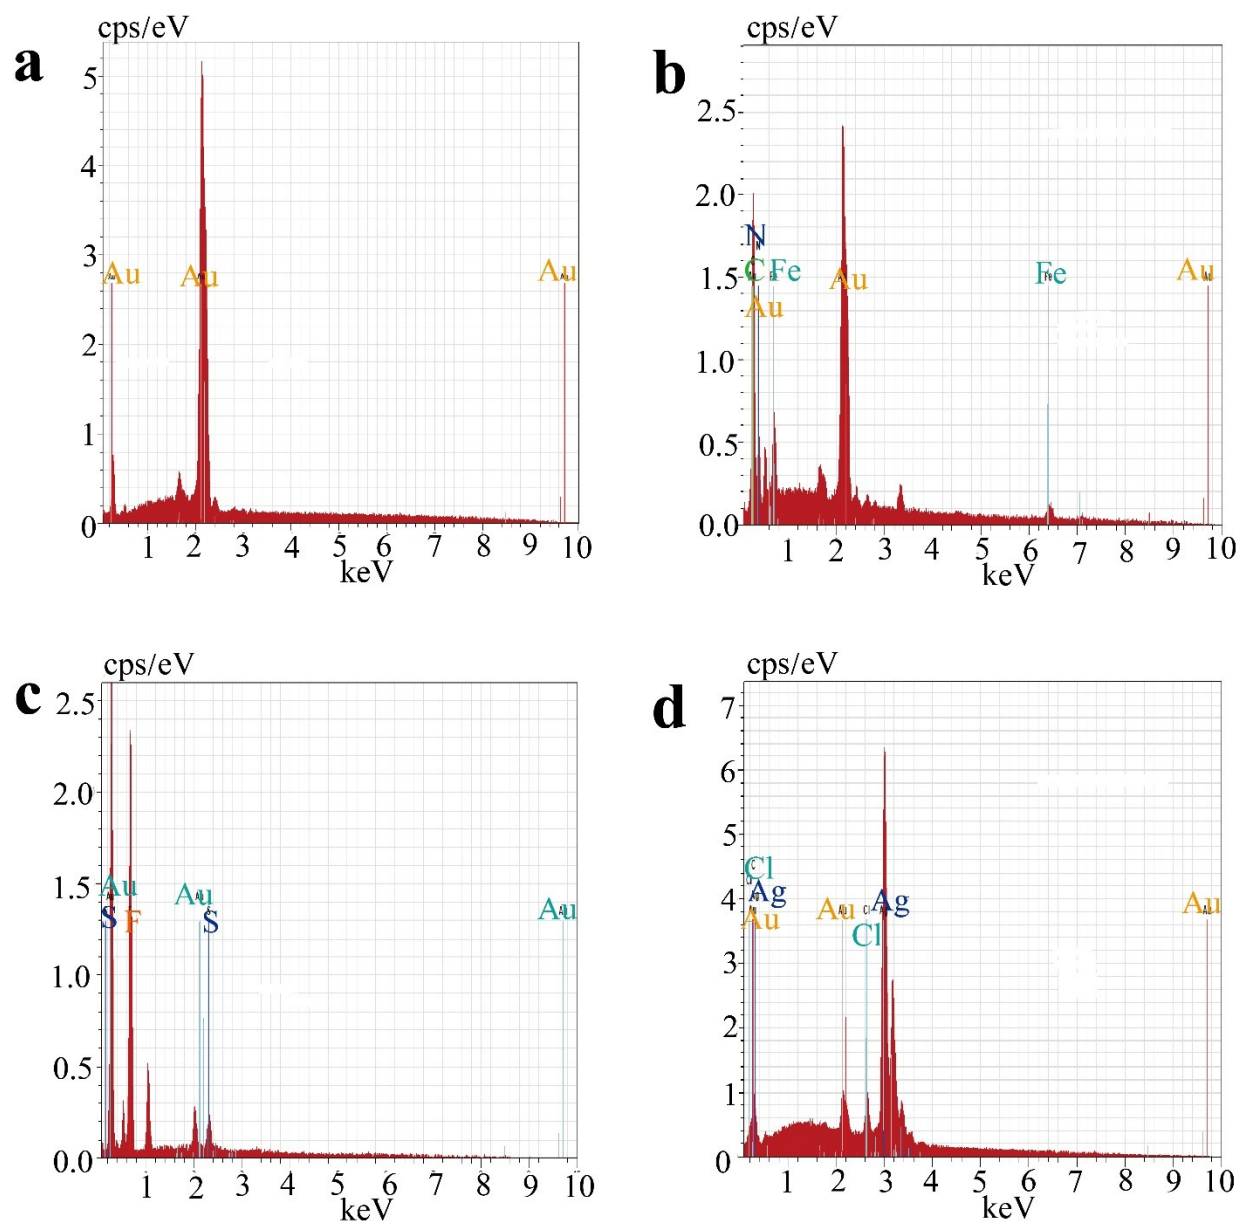

**Fig. S7** EDS point analysis of the Au electrode and the Ag/AgCl electrode. (a) The original Au electrode. (b) The Au electrode after the deposition of Prussian blue. (c) The Au electrode modified with the Nafion membrane. (d) The Ag/AgCl electrode.

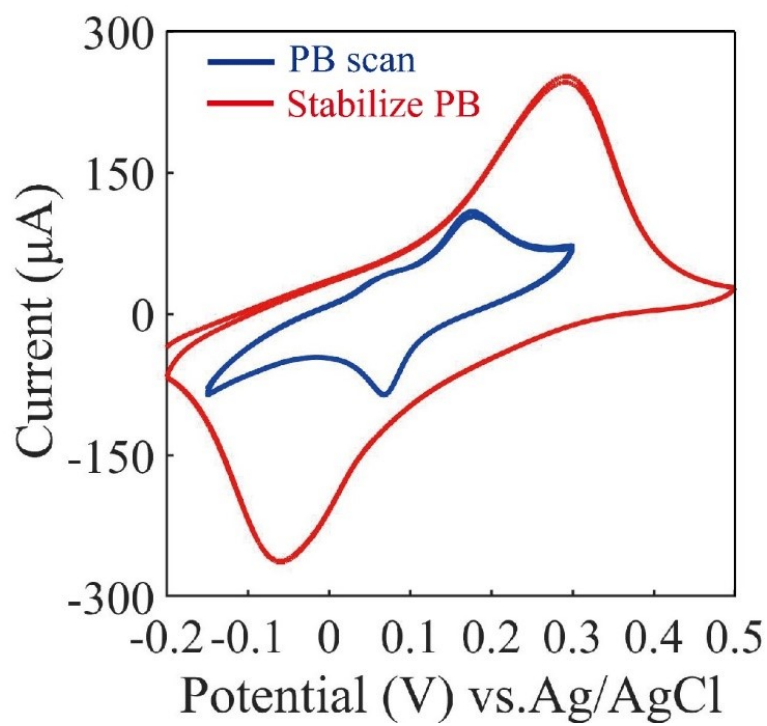

**Fig. S8** Cyclic voltammograms for electrodepositing and stabilizing Prussian blue layer on the Au electrode.

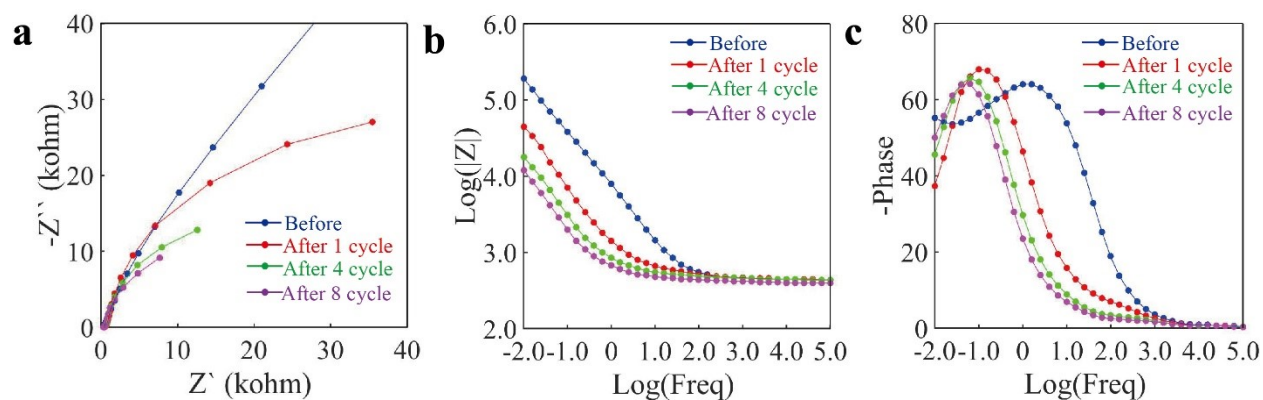

**Fig. S9** Nyquist and Bode plots of the Au working electrode after the deposition of different cycles of Prussian blue in the scan frequency from  $1 \times 10^{-2}$  to  $1 \times 10^5$  Hz. (a) Magnified image of the Nyquist plot in low impedance. (a) Bode plot of impedance. (b) Bode plot of phase.

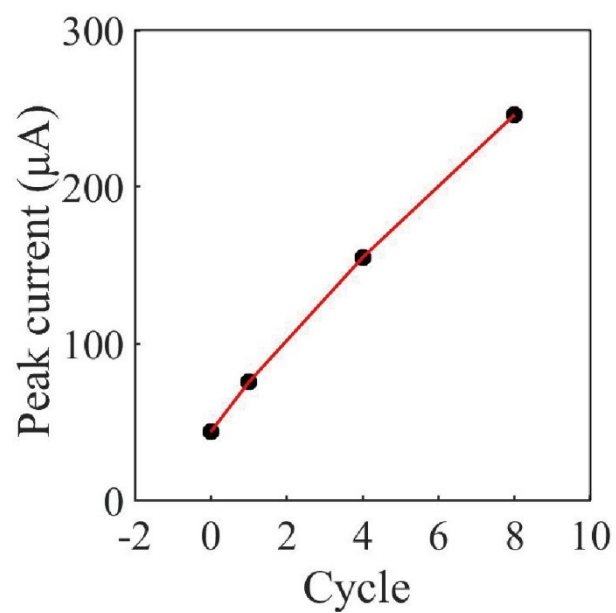

**Fig. S10** The oxidation peak currents of cyclic voltammograms of the biosensor with different thicknesses of PB layer in the 0.1 M KCl/HCl solution.

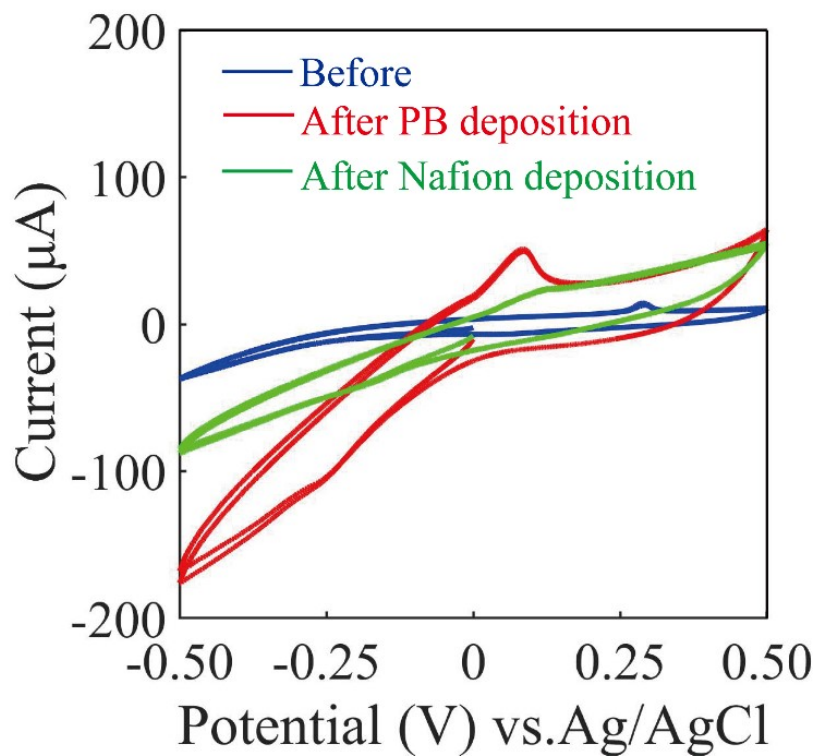

**Fig. S11** The cyclic voltammograms of the biosensor before and after the deposition of Prussian blue, and Nafion membrane in PBS containing 4 mM  $\text{H}_2\text{O}_2$  (scanning rate: 100 mV/s).

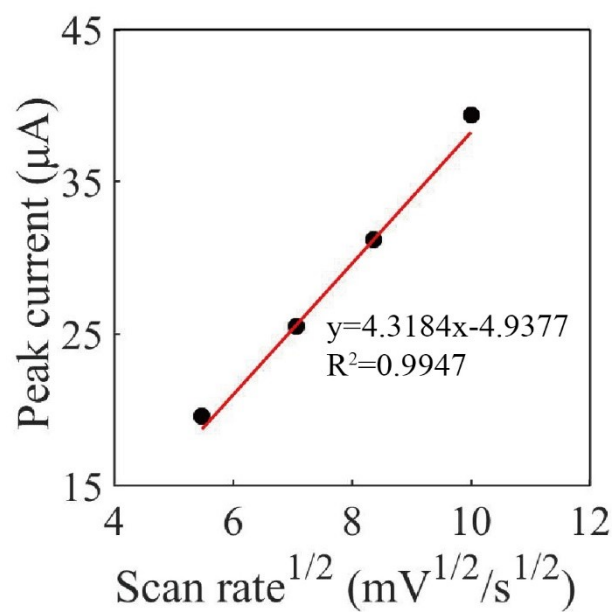

**Fig. S12** Relationship between peak currents and the square root of scan rates in the cyclic voltammograms curves of the biosensor for sensing 4 mM H<sub>2</sub>O<sub>2</sub> in PBS at different scan rates.

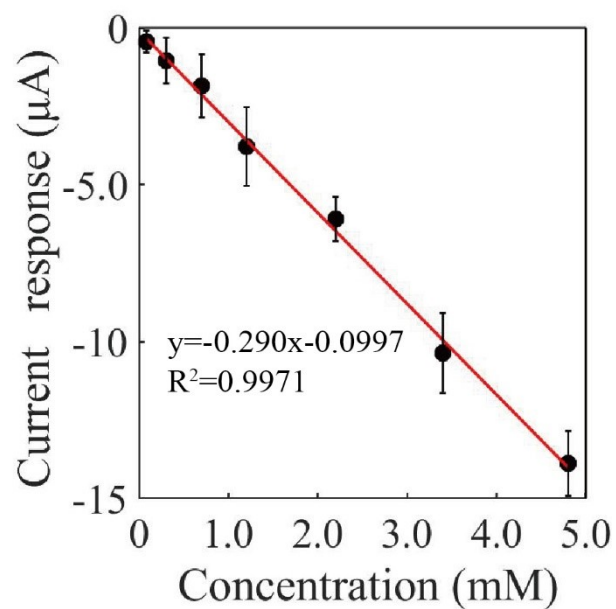

**Fig. S13** Calibration curve upon the additions of  $\text{H}_2\text{O}_2$  in PBS on the biosensor ( $n=3$ ). Relationship between peak currents and the square root of scan rates in the cyclic voltammograms curves of the biosensor for sensing 4 mM  $\text{H}_2\text{O}_2$  in PBS at different scan rates.

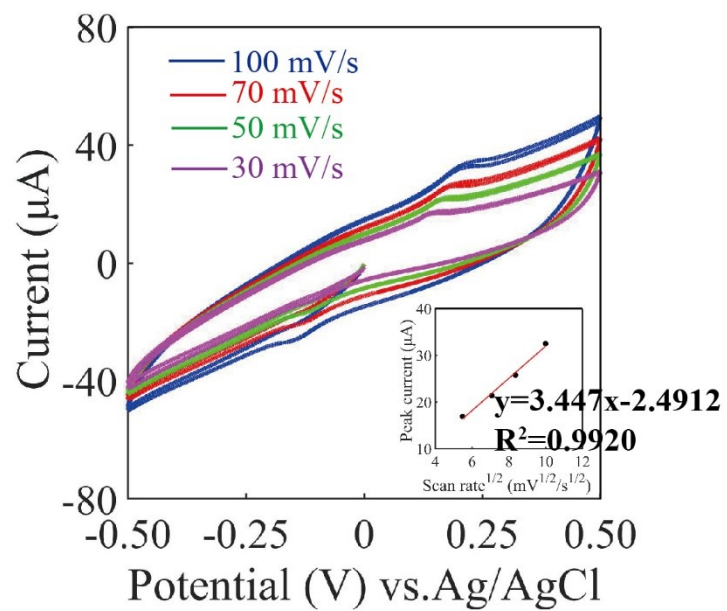

**Fig. S14** The cyclic voltammograms and calibration curve of the biosensor for sensing 4 mM glucose in PBS at different scan rates.

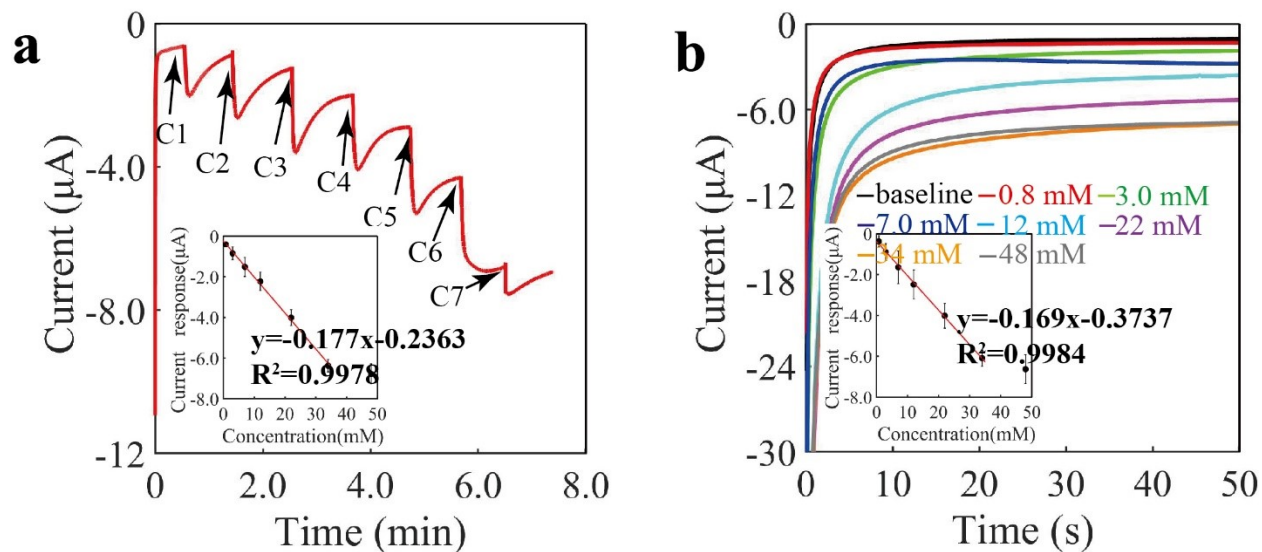

**Fig. S15** Performance of the biosensor for sensing 4 mM glucose in PBS at different scan rates. (a) The current-verses-time response and calibration curve for detecting glucose in PBS (n=3). C1: 0.8 mM, C2: 2.2 mM, C3: 4.0 mM, C4: 5.0 mM, C5: 10 mM, C6: 12 mM, C7: 14 mM. (b) Current baseline response and calibration curve for detecting glucose in PBS (n=3).

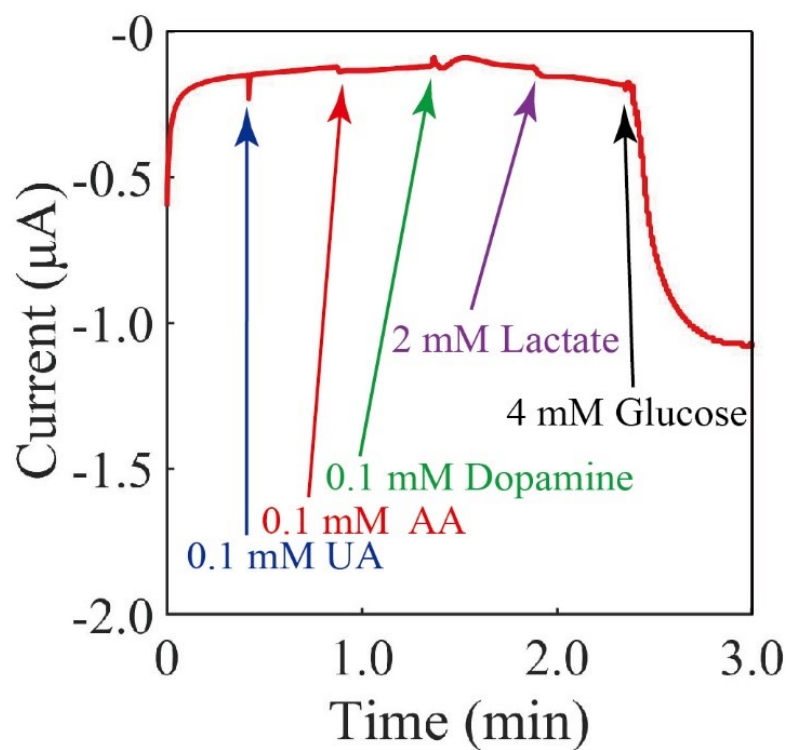

**Fig. S16** The selective response of the sensor to glucose and other interfering substances (UA: uric acid, AA: ascorbic acid).

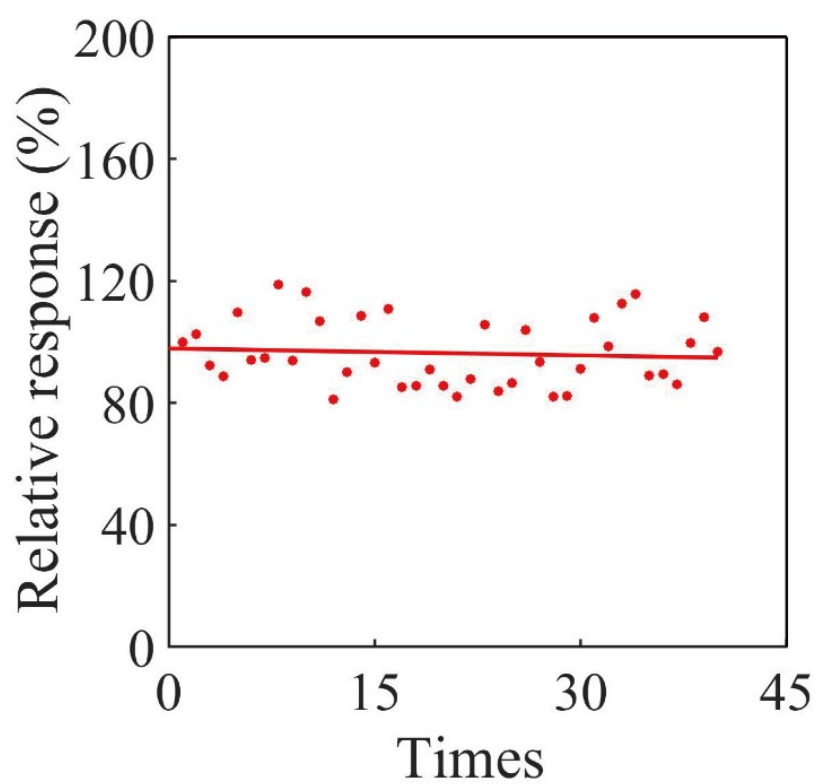

**Fig. S17** Repeatability study of the biosensor. The repeatability study was conducted by continuously measuring the glucose for 40 times.

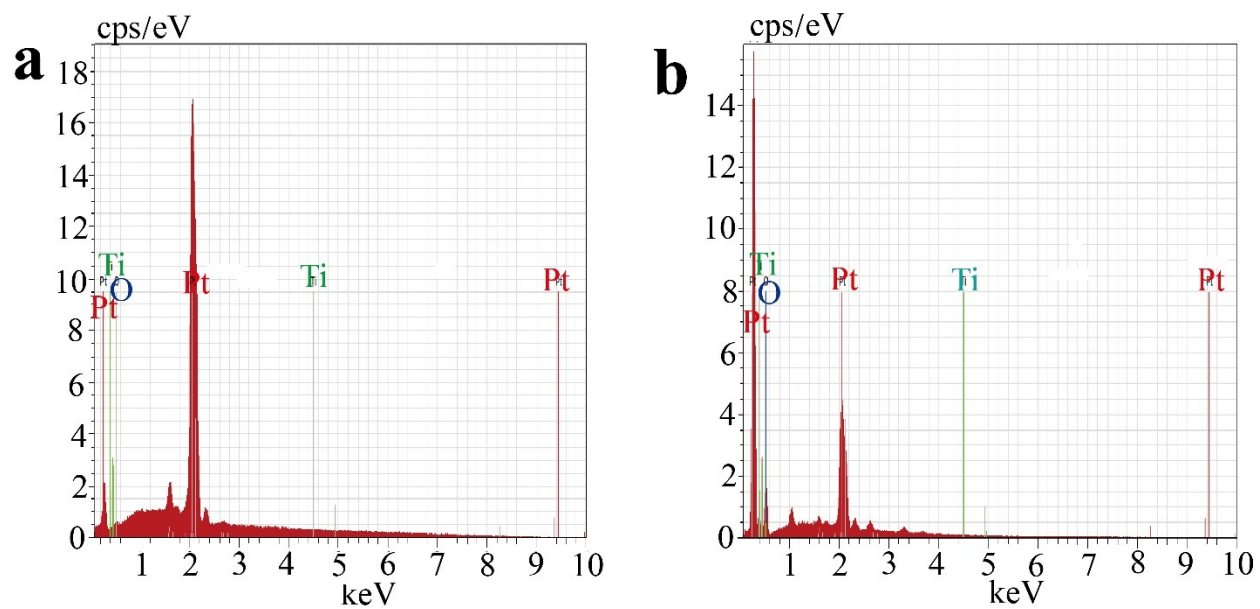

**Fig. S18** EDS point analysis of the Pt interdigital electrode. (a) The original Pt interdigital electrode. (b) The Pt interdigital electrode after oxidation and degradation.

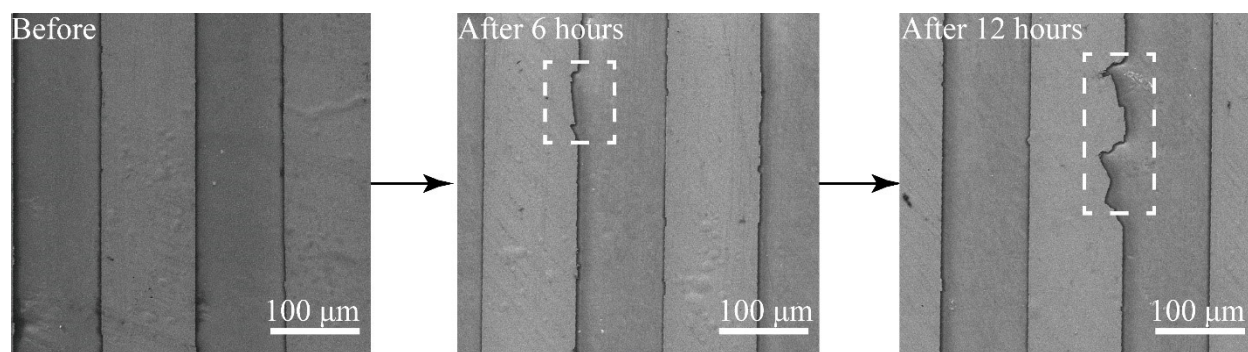

**Fig. S19** SEM images of the original Pt interdigital electrode and after continuous working in 2 mA for 6 and 12 hrs.

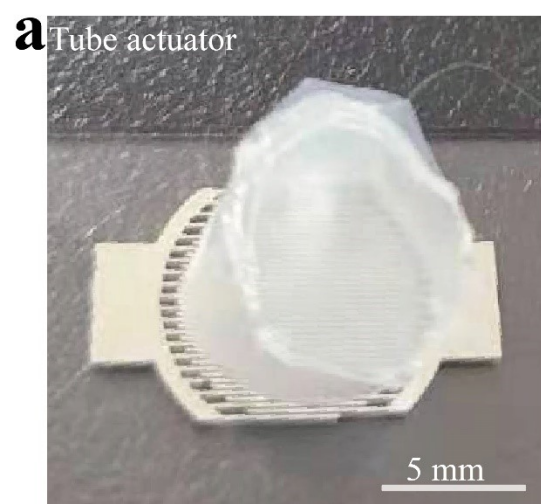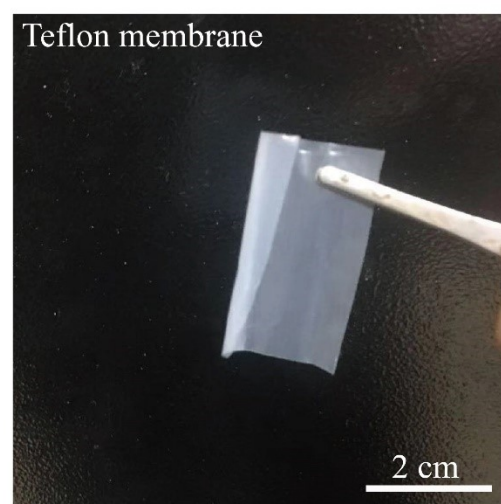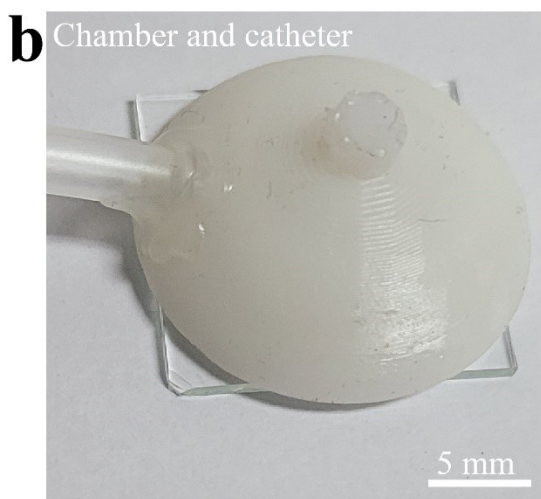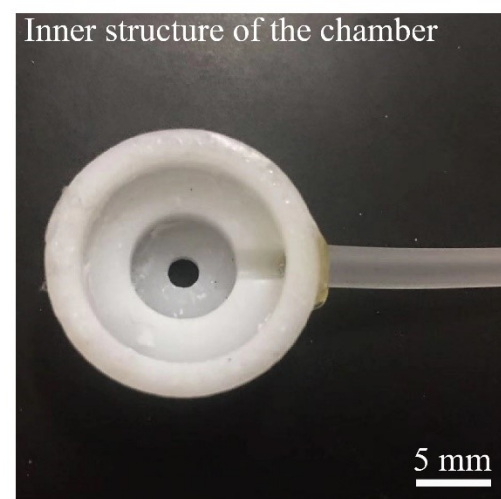

**Fig. S20** Camera images of the actuator and the Teflon membrane (a), the chamber and catheter (b).

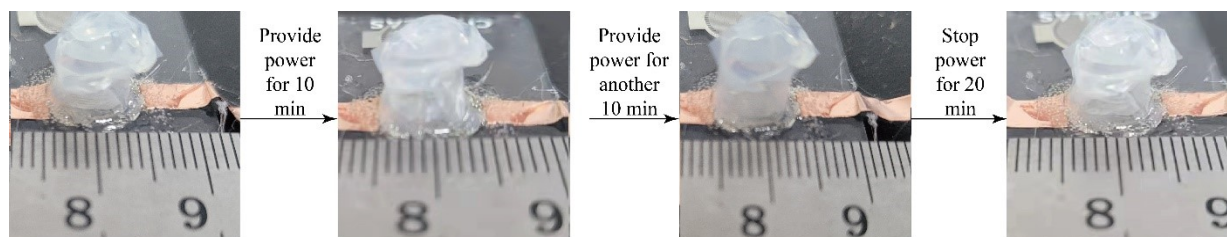

**Fig. S21** Photographs of the shape change of the actuator under 1 mA in 20 minutes and after stopping the power for 20 min.

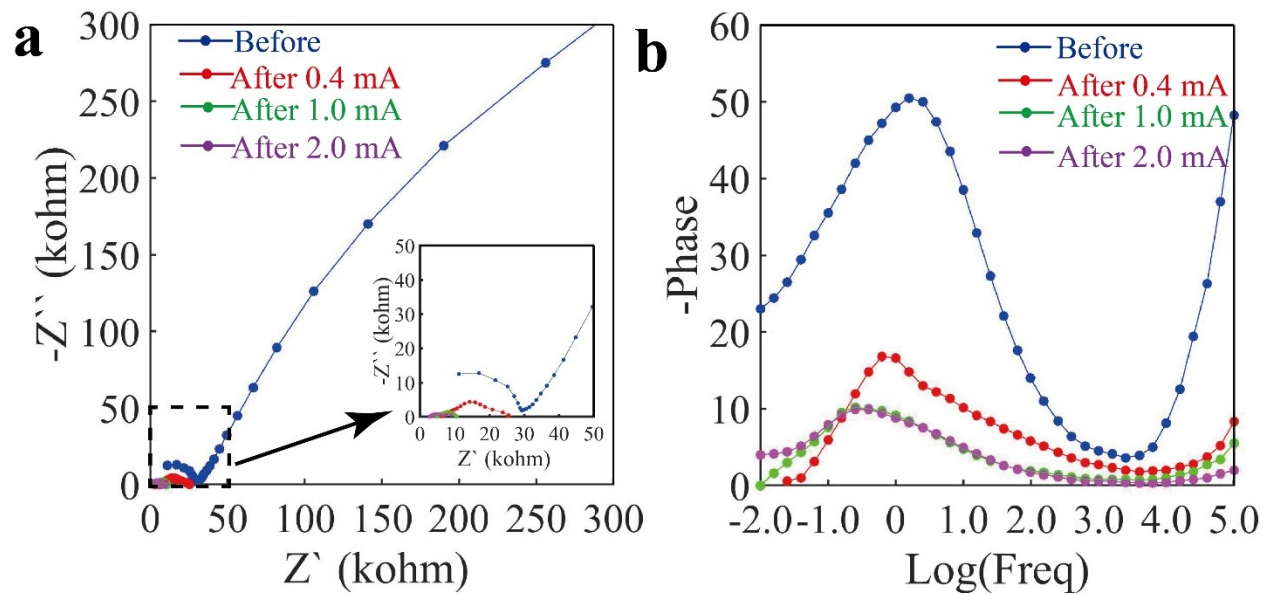

**Fig. S22** Nyquist and Bode plot of the Pt interdigital electrode after the application of different constant currents for 10 minutes in scan frequency from  $1 \times 10^{-2}$  to  $1 \times 10^5$  Hz. (a) Nyquist plot. (b) Phase of Bode plot.

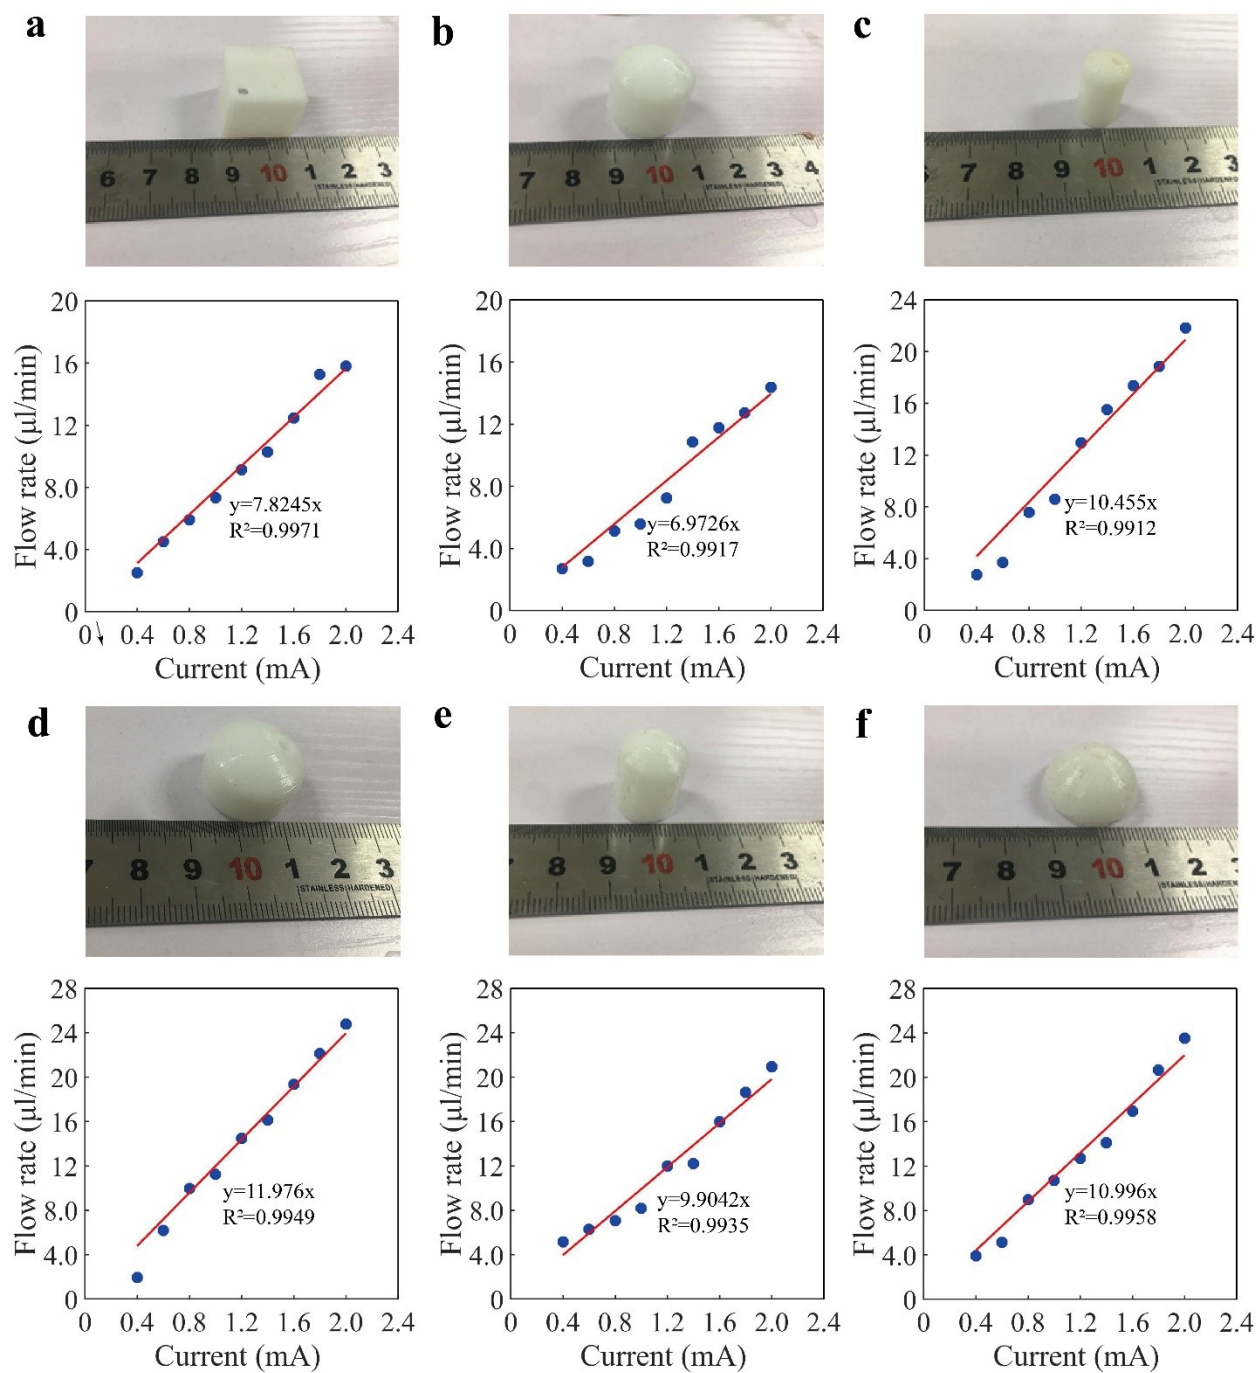

**Fig. S23** Flow rate of the refillable electrochemical micropump with different shapes and sizes of the chamber.

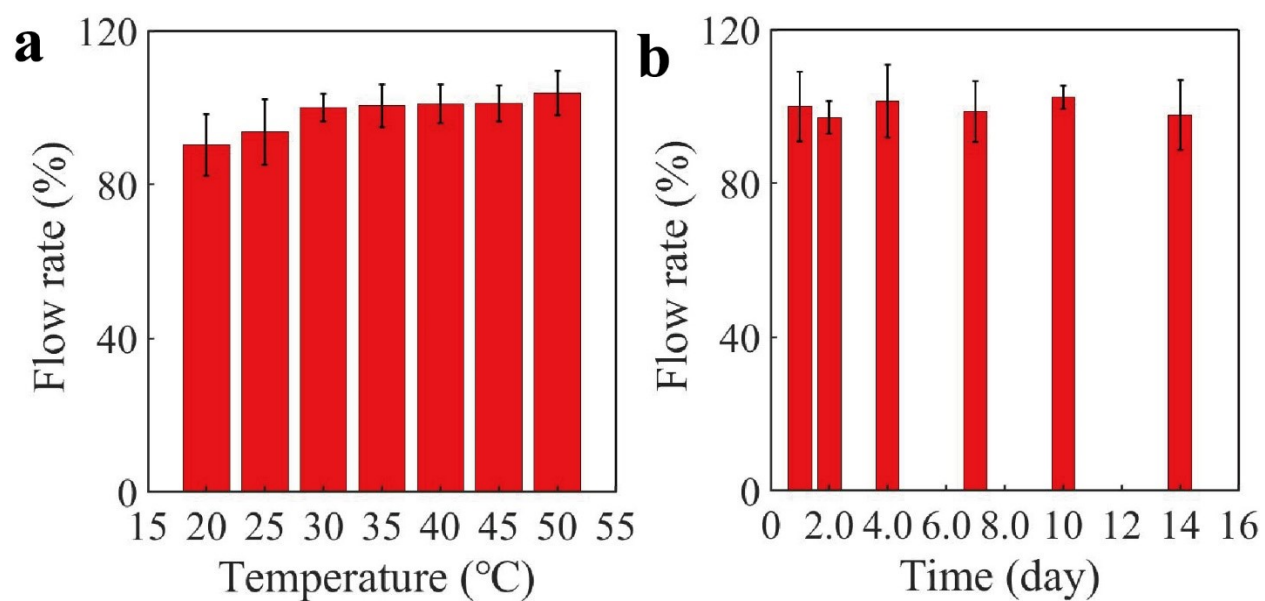

**Fig. S24** Stability of the refillable electrochemical micropump. (a) The temperature stability of the micropump at 20 to 50 °C (n=3). (i) The storage stability of the sensor over 14 days (n=3).

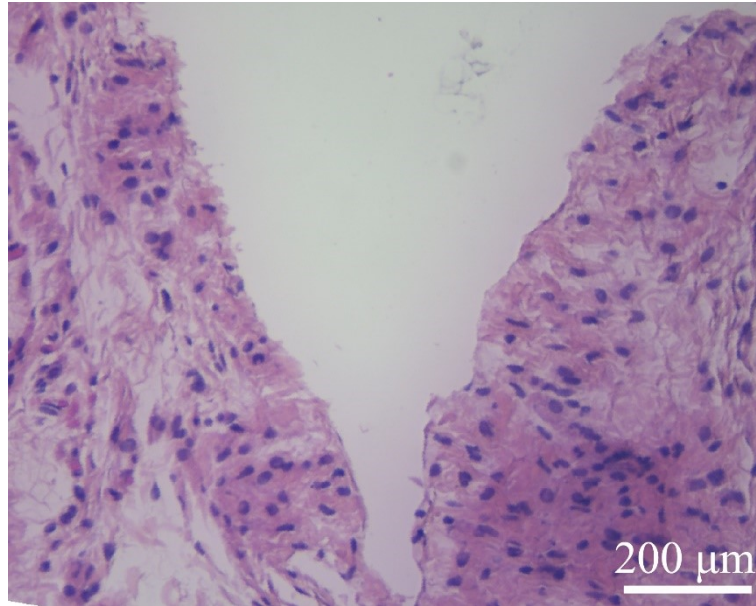

**Fig. S25** An optical image of the hematoxylin and eosin-stained pierced skin section after removing the microneedle array.

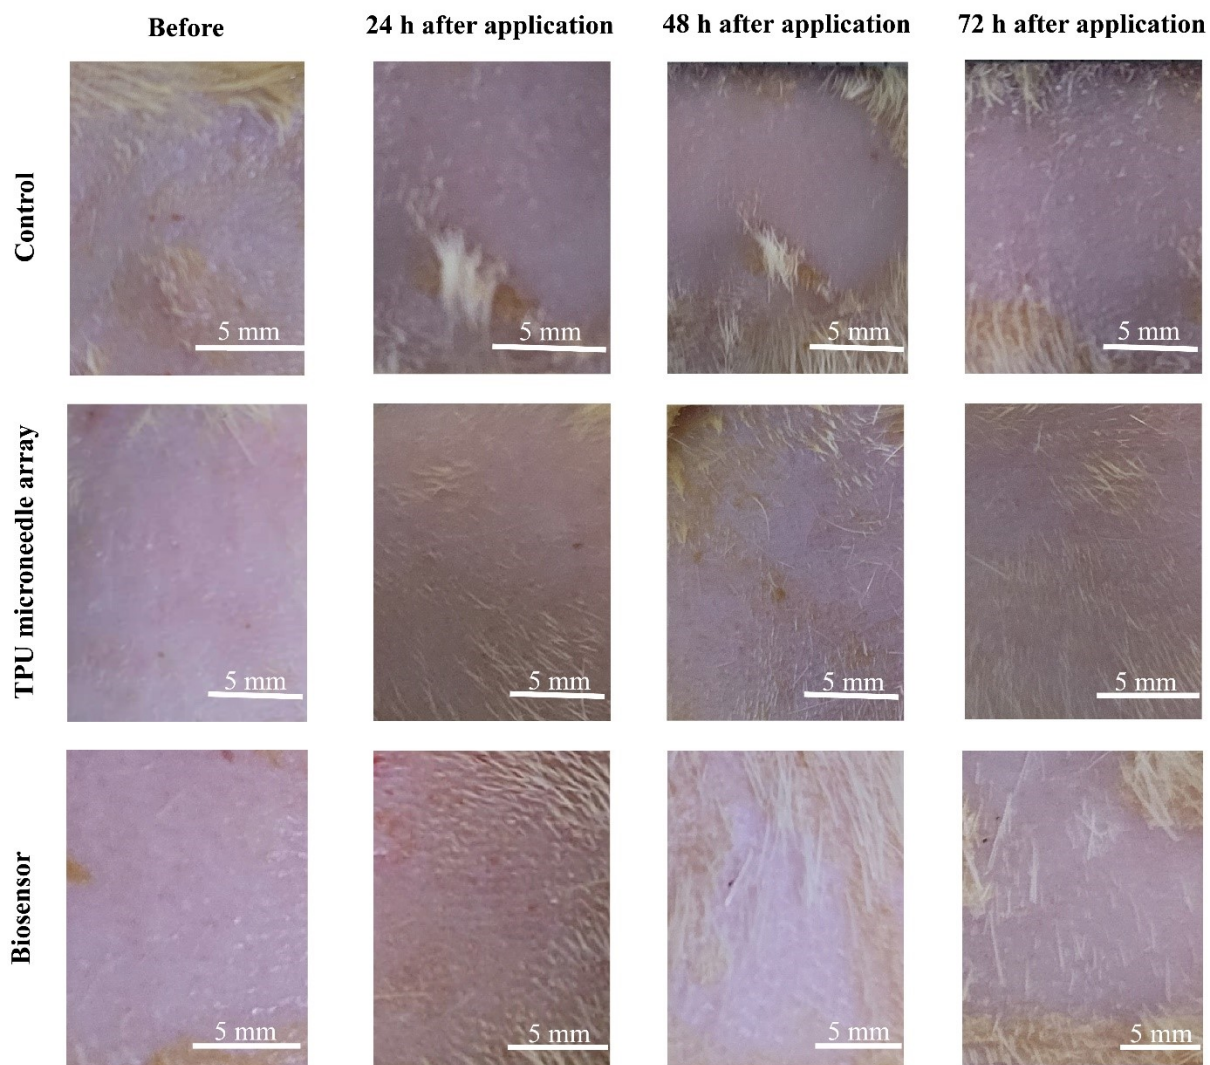

**Fig. S26** Camera images of the rats' skin irritation test before and after removing the TPU microneedle array biosensor.

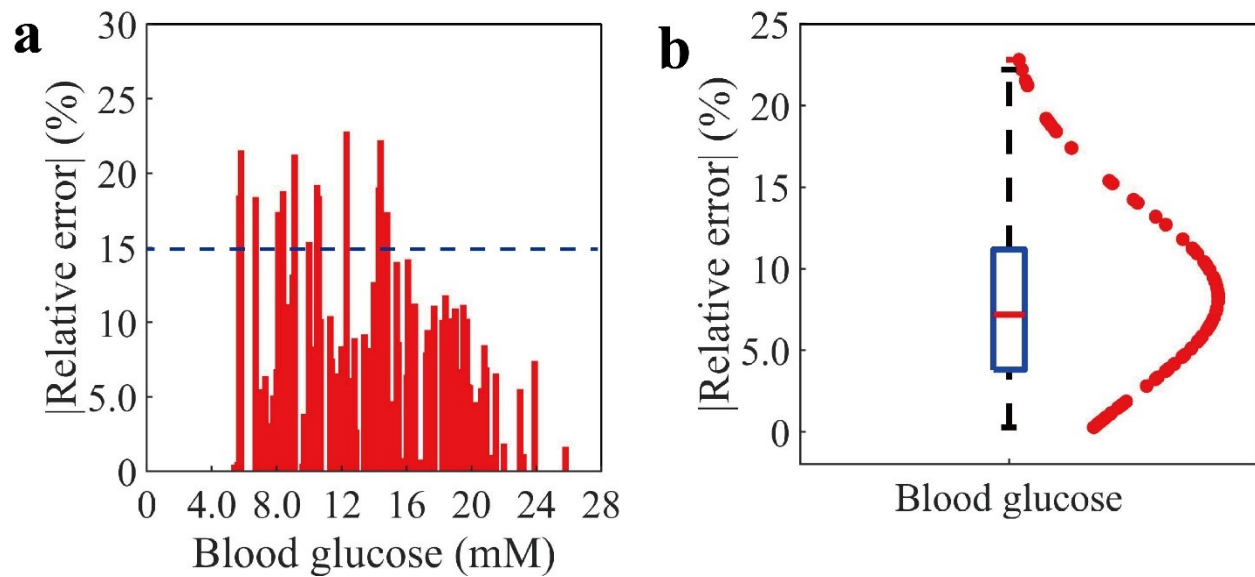

**Fig. S27** Relative error of the biosensor at different blood glucose values (the data was from six diabetic rats).

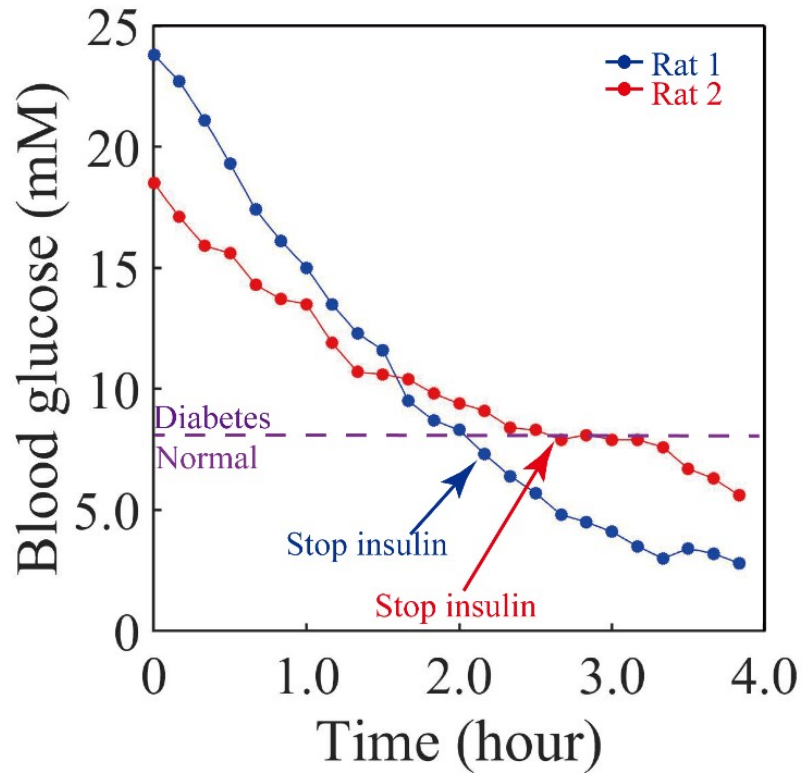

**Fig. S28** The blood glucose levels versus time with the closed-loop button-like system in another two rats without a glucose intake.

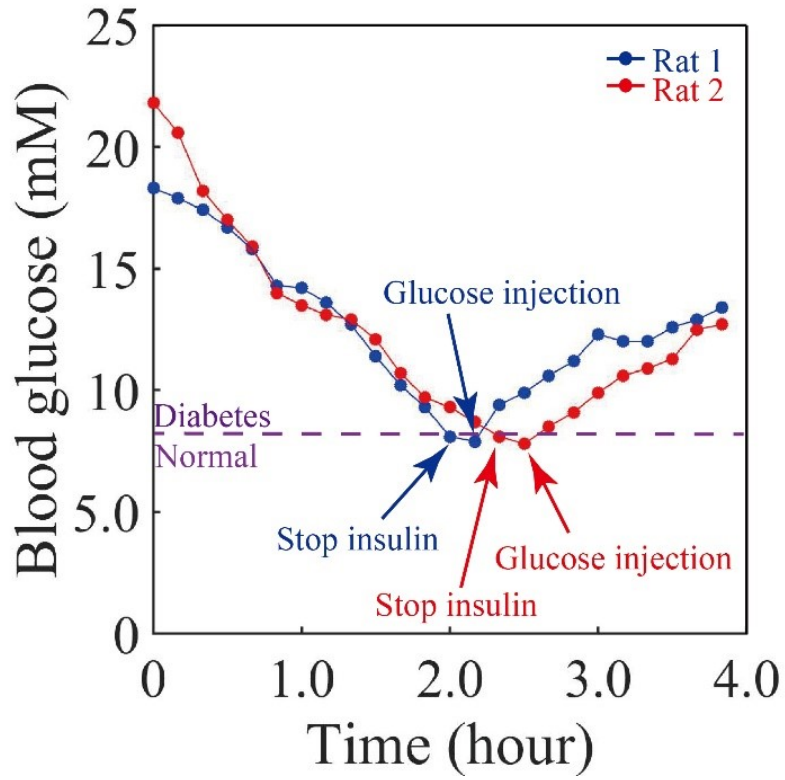

**Fig. S29** The blood glucose levels versus time with the closed-loop button-like system in another two rats with the injection of glucose intraperitoneally.

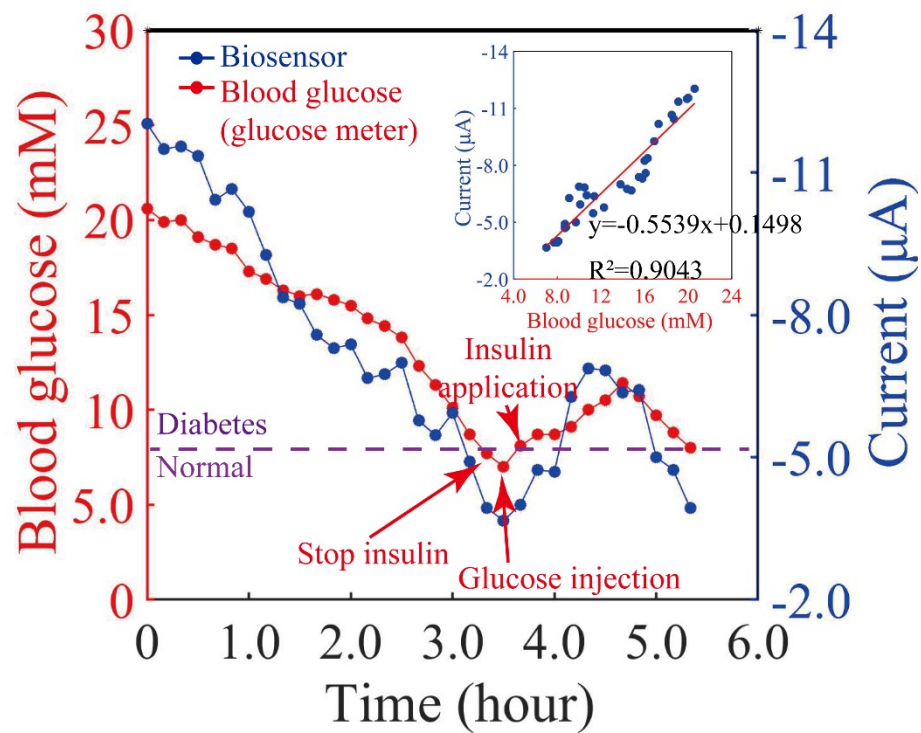

**Fig. S30** The blood glucose levels versus time with the closed-loop button-like system with a glucose intake in a terminal-stage diabetic rat (the model time was one month ago).

**Table S1.** Comparison of this work and other micropumps in closed-loop management systems

| Device                                                            | Working principle                                                                | Pump size                                           | Insulin flow rate                                                                                                        | Stability                          | Reference |
|-------------------------------------------------------------------|----------------------------------------------------------------------------------|-----------------------------------------------------|--------------------------------------------------------------------------------------------------------------------------|------------------------------------|-----------|
| Commercial 770G<br>insulin pump<br>developed by<br>Medtronic Inc. | Electro-motor                                                                    | 9×6×2 cm                                            | Automatically adjust<br>insulin delivery rate<br>every 5 minutes with the<br>accuracy of 0.025 U/h                       | Stable for<br>long-term            | 1         |
| Iontophoresis with<br>microneedle array                           | Iontophoresis                                                                    | About 4.3<br>cm <sup>2</sup>                        | 5 IU released into the<br>body in 3 hours                                                                                | No stability<br>evaluation         | 2         |
| 3D printed syringe<br>with microneedle<br>array                   | Syringe                                                                          | Large size                                          | No precise release rate                                                                                                  | No stability<br>evaluation         | 3         |
| Electroosmotic pump<br>with microneedle<br>array                  | Electroosmotic                                                                   | 2.5 cm in<br>diameter and<br>1.5 cm in<br>thickness | Maximum flow rate: 9.42<br>μl/min for 10 U/ml<br>insulin                                                                 | Flow rate<br>decrease<br>with time | 4         |
| Electroosmotic pump<br>with microtube                             | Electroosmotic                                                                   | 2 cm in<br>diameter and<br>1.5 cm in<br>height      | Maximum flow rate:<br>3.376 μl/min for 10 U/ml<br>insulin                                                                | Flow rate<br>decrease<br>with time | 5         |
| Electrochemical<br>pump with<br>microneedle array                 | Electrolysis of water<br>to generate gas<br>bubbles for driving<br>liquid motion | 2 cm in<br>diameter and<br>1.2 cm in<br>height      | Maximum flow rate: 22<br>μl/min for insulin and the<br>flow rate does not change<br>with the concentration of<br>insulin | Stable for<br>14 days              | This work |

## References

1. Medtronic, The MiniMed™ 770G System, <https://www.medtronicdiabetes.com/products/minimed-770g-insulin-pump-system#prod-comparison>).
2. X. L. Li, X. S. Huang, J. S. Mo, H. Wang, Q. Q. Huang, C. Yang, T. Zhang, H. J. Chen, T. Hang, F. M. Liu, L. L. Jiang, Q. N. Wu, H. B. Li, N. Hu and X. Xie, *Adv. Sci.*, 2021, **8**, 2100827.
3. O. Heifler, E. Borberg, N. Harpak, M. Zverzhinetsky, V. Krivitsky, I. Gabriel, V. Fourman, D. Sherman and F. Patolsky, *ACS Nano*, 2021, **15**, 12019-12033.
4. X. J. Luo, Q. Yu, Y. Q. Liu, W. X. Gai, L. Ye, L. Yang and Y. Cui, *ACS Sens.*, 2022, **7**, 1347-1360.
5. Y. Q. Liu, Q. Yu, X. J. Luo, L. Ye, L. Yang and Y. Cui, *Research*, 2022, **Article in press**, 9870637.
